# Supplementary material for: WHO Environmental Noise Guidelines for the European Region: A Systematic Review on Environmental Noise and Adverse Birth Outcomes
Source: MDPI journal article supplement (doi:10.3390/ijerph14101252), 2017-10-19
Supplement: s1 [file s1]

## Supplementary materials

**Table S1.** GRADE for the quality of evidence of aircraft noise associated with pre-term delivery.

| <b>Domains</b>          | <b>Criterion</b>                                       | <b>Assessment</b>                 | <b>Downgrading</b>         |
|-------------------------|--------------------------------------------------------|-----------------------------------|----------------------------|
| <b>Start Level</b>      |                                                        | <b>Cross-sectional and survey</b> | <b>Low quality</b>         |
| 1. Study Limitations    | Majority of studies low quality                        | few studies of low quality        | <b>Downgrade one level</b> |
| 2. Inconsistency        | Conflicting results; high I <sup>2</sup>               | Difficult to judge                | <b>Downgrade one level</b> |
| 3. Directness           | Direct comparison; same PECCO                          | Good                              | <b>No downgrade</b>        |
| 4. Precision            | Confidence interval contains 25% harm or benefit       | Difficult to judge                | <b>No downgrade</b>        |
| 5. Publication Bias     | Funnel plot indicates                                  | No information available          | <b>No downgrade</b>        |
| 6. Dose-response        | Significant trend                                      | Difficult to judge                | <b>No upgrade</b>          |
| 7. Magnitude of effect  | RR > 2                                                 | No                                | <b>No upgrade</b>          |
| 8. Confounding adjusted | Effect in spite of confounding working towards the nil | Unclear                           | <b>No upgrade</b>          |
| <b>Overall Judgment</b> |                                                        |                                   | <b>Very low</b>            |

**Table S2.** GRADE for the quality of evidence of aircraft noise associated with low birth weight.

| <b>Domains</b>          | <b>Criterion</b>                                       | <b>Assessment</b>                     | <b>Downgrading</b>         |
|-------------------------|--------------------------------------------------------|---------------------------------------|----------------------------|
| <b>Start Level</b>      |                                                        | <b>Case-control studies</b>           | <b>Low quality</b>         |
| 1. Study Limitations    | Majority of studies low quality                        | Yes                                   | <b>Downgrade one level</b> |
| 2. Inconsistency        | Conflicting results; high I <sup>2</sup>               | Similar direction but overall unclear | <b>Downgrade one level</b> |
| 3. Directness           | Direct comparison; same PECCO                          | Yes direct evidence                   | <b>No downgrade</b>        |
| 4. Precision            | Confidence interval contains 25% harm or benefit       | Only for one study clearly            | <b>Downgrade one level</b> |
| 5. Publication Bias     | Funnel plot indicates                                  | Not able to assess                    | <b>No downgrade</b>        |
| 6. Dose-response        | Significant trend                                      | Only for one study clearly            | <b>No upgrade</b>          |
| 7. Magnitude of effect  | RR > 2                                                 | No                                    | <b>No upgrade</b>          |
| 8. Confounding adjusted | Effect in spite of confounding working towards the nil | Not fully adjusted                    | <b>No upgrade</b>          |
| <b>Overall Judgment</b> |                                                        |                                       | <b>Very low</b>            |

**Table S3.** GRADE for the quality of evidence of aircraft noise associated with congenital malformations.

| <b>Domains</b>       | <b>Criterion</b>                         | <b>Assessment</b>                  | <b>Downgrading</b>         |
|----------------------|------------------------------------------|------------------------------------|----------------------------|
| <b>Start Level</b>   |                                          | <b>Ecological study and survey</b> | <b>Low quality</b>         |
| 1. Study Limitations | Majority of studies low quality          | Yes                                | <b>Downgrade one level</b> |
| 2. Inconsistency     | Conflicting results; high I <sup>2</sup> | yes                                | <b>Downgrade one level</b> |
| 3. Directness        | Direct comparison; same PECCO            | Yes                                | <b>No downgrade</b>        |
| 4. Precision         | Confidence interval contains 25% harm    | No                                 | <b>Downgrade one level</b> |

|                          |                                                        |    |                     |
|--------------------------|--------------------------------------------------------|----|---------------------|
|                          | or benefit                                             |    |                     |
| 5. Publication Bias      | Funnel plot indicates                                  | No | <b>No downgrade</b> |
| 6. Dose-response         | Significant trend                                      | No | <b>No upgrade</b>   |
| 7. Magnitude of effect   | RR > 2                                                 | No | <b>No upgrade</b>   |
| 8. Confounding adjusted  | Effect in spite of confounding working towards the nil | No | <b>No upgrade</b>   |
| <b>Overall Judgement</b> |                                                        |    | <b>Very low</b>     |

**Table S4.** GRADE for the quality of evidence of road traffic noise associated with pre-term delivery

| <b>Domains</b>          | <b>Criterion</b>                                       | <b>Assessment</b>              | <b>Downgrading</b>         |
|-------------------------|--------------------------------------------------------|--------------------------------|----------------------------|
| <b>Start Level</b>      |                                                        | <b>Cohort study</b>            | <b>High quality</b>        |
| 1. Study Limitations    | Majority of studies low quality                        | Only one study of good quality | <b>No downgrade</b>        |
| 2. Inconsistency        | Conflicting results; high I <sup>2</sup>               | Only one study                 | <b>Downgrade one level</b> |
| 3. Directness           | Direct comparison; same PECCO                          | Yes                            | <b>No downgrade</b>        |
| 4. Precision            | Confidence interval contains 25% harm or benefit       | No                             | <b>Downgrade one level</b> |
| 5. Publication Bias     | Funnel plot indicates                                  | Not able to assess             | <b>No downgrade</b>        |
| 6. Dose-response        | Significant trend                                      | No                             | <b>No upgrade</b>          |
| 7. Magnitude of effect  | RR > 2                                                 | No                             | <b>No upgrade</b>          |
| 8. Confounding adjusted | Effect in spite of confounding working towards the nil | No                             | <b>No upgrade</b>          |
| <b>Overall Judgment</b> |                                                        |                                | <b>Low Quality</b>         |

**Table S5. GRADE for the quality of evidence of road traffic noise associated with low birth weight.**

| <b>Domains</b>          | <b>Criterion</b>                                       | <b>Assessment</b>                                                                   | <b>Downgrading</b>         |
|-------------------------|--------------------------------------------------------|-------------------------------------------------------------------------------------|----------------------------|
| <b>Start Level</b>      |                                                        | <b>Cohort studies</b>                                                               | <b>High quality</b>        |
| 1. Study Limitations    | Majority of studies low quality                        | No, all low risk of bias                                                            | <b>No downgrade</b>        |
| 2. Inconsistency        | Conflicting results; high I <sup>2</sup>               | Inconsistent results                                                                | <b>Downgrade one level</b> |
| 3. Directness           | Direct comparison; same PECCO                          | yes                                                                                 | <b>No downgrade</b>        |
| 4. Precision            | Confidence interval contains 25% harm or benefit       | Not precise                                                                         | <b>Downgrade one level</b> |
| 5. Publication Bias     | Funnel plot indicates                                  | Not able to assess                                                                  | <b>No downgrade</b>        |
| 6. Dose-response        | Significant trend                                      | Not in all studies                                                                  | <b>No upgrade</b>          |
| 7. Magnitude of effect  | RR > 2                                                 | No                                                                                  | <b>No upgrade</b>          |
| 8. Confounding adjusted | Effect in spite of confounding working towards the nil | Most confounders are connected to noise levels and outcomes would increase the risk | <b>No upgrade</b>          |
| <b>Overall Judgment</b> |                                                        |                                                                                     | <b>Low Quality</b>         |

**Table S6.** GRADE for the quality of evidence of road traffic noise associated with small for gestational age.

| <b>Domains</b>          | <b>Criterion</b>                                       | <b>Assessment</b>                                              | <b>Downgrading</b>         |
|-------------------------|--------------------------------------------------------|----------------------------------------------------------------|----------------------------|
| <b>Start Level</b>      |                                                        | <b>Cohort study</b>                                            | <b>High quality</b>        |
| 1. Study Limitations    | Majority of studies low quality                        | No                                                             | <b>No downgrade</b>        |
| 2. Inconsistency        | Conflicting results; high I <sup>2</sup>               | Two studies based on the same subjects and exposure assessment | <b>Downgrade one level</b> |
| 3. Directness           | Direct comparison; same PECCO                          | yes                                                            | <b>No downgrade</b>        |
| 4. Precision            | Confidence interval contains 25% harm or benefit       | No                                                             | <b>Downgrade one level</b> |
| 5. Publication Bias     | Funnel plot indicates                                  | Not able to assess                                             | <b>No downgrade</b>        |
| 6. Dose-response        | Significant trend                                      | Not able to assess                                             | <b>No upgrade</b>          |
| 7. Magnitude of effect  | RR > 2                                                 | No                                                             | <b>No upgrade</b>          |
| 8. Confounding adjusted | Effect in spite of confounding working towards the nil | Yes                                                            | <b>No upgrade</b>          |
| <b>Overall Judgment</b> |                                                        |                                                                | <b>Low</b>                 |

**Table S7 Assessment of the risk of bias in the individual studies for Table S1**

| Ref.              | year | Bias due to selection of participants | Information bias due to exposure assessment | Outcome bias I | Outcome bias II | Bias due to confounding | Count of columns with low risk of bias | Total risk of bias |
|-------------------|------|---------------------------------------|---------------------------------------------|----------------|-----------------|-------------------------|----------------------------------------|--------------------|
| Schell [11]       | 1981 | high                                  | low                                         | high           | high            | low                     | 2                                      | high               |
| Matsui et al [13] | 2007 | low                                   | high                                        | low            | high            | high                    | 2                                      | high               |

**Table S8 Assessment of the risk of bias in the individual studies for Table S2**

| Ref.                  | year | Bias due to selection of participants | Information bias due to exposure assessment | Outcome bias I | Outcome bias II | Bias due to confounding | Count of columns with low risk of bias | Total risk of bias |
|-----------------------|------|---------------------------------------|---------------------------------------------|----------------|-----------------|-------------------------|----------------------------------------|--------------------|
| Ando and Hattori [10] | 1973 | high                                  | low                                         | high           | high            | high                    | 1                                      | high               |
| Schell [11]           | 1981 | high                                  | low                                         | high           | high            | low                     | 2                                      | high               |
| Knipschild et al [12] | 1981 | low                                   | low                                         | high           | high            | high                    | 2                                      | high               |
| Matsui et al [13]     | 2007 | low                                   | high                                        | low            | high            | high                    | 1                                      | high               |

**Table S9 Assessment of the risk of bias in the individual studies for Table S3**

| Ref.                    | year | Bias due to selection of participants | Information bias due to exposure assessment | Outcome bias I | Outcome bias II | Bias due to confounding | Count of columns with low risk of bias | Total risk of bias |
|-------------------------|------|---------------------------------------|---------------------------------------------|----------------|-----------------|-------------------------|----------------------------------------|--------------------|
| Jones and Tauscher [14] | 1978 | low                                   | high                                        | low            | high            | high                    | 2                                      | high               |

|                    |      |     |      |     |      |      |   |      |
|--------------------|------|-----|------|-----|------|------|---|------|
| Edmonds et al [15] | 1979 | low | high | low | high | high | 2 | high |
|--------------------|------|-----|------|-----|------|------|---|------|

**Table S10 Assessment of the risk of bias in the individual studies for Table S4**

|                    |       | Bias due to selection of participants | Information bias due to exposure assessment | Outcome bias I | Outcome bias II | Bias due to confounding | Count of columns with low risk of bias | Total risk of bias |
|--------------------|-------|---------------------------------------|---------------------------------------------|----------------|-----------------|-------------------------|----------------------------------------|--------------------|
| Gehring et al [17] | 2014  | low                                   | high                                        | low            | low             | low                     | 4                                      | low                |
| Hystadt et al [19] | 2014  | low                                   | high                                        | low            | low             | low                     | 4                                      | low                |
| Arroyo et al [22]  | 2016a | low                                   | low                                         | high           | high            | high                    | 2                                      | high               |
| Arroyo et al [21]  | 2016b | low                                   | low                                         | high           | high            | high                    | 2                                      | high               |

**Table S11 Assessment of the risk of bias in the individual studies for Table S5**

|                        |       | Bias due to selection of participants | Information bias due to exposure assessment | Outcome bias I | Outcome bias II | Bias due to confounding | Count of columns with low risk of bias | Total risk of bias |
|------------------------|-------|---------------------------------------|---------------------------------------------|----------------|-----------------|-------------------------|----------------------------------------|--------------------|
| Wu et al [16]          | 1996  | low                                   | low                                         | low            | low             | high                    | 4                                      | low                |
| Gehring et al [17]     | 2014  | low                                   | high                                        | low            | low             | low                     | 4                                      | low                |
| Dadvand et al [18]     | 2014  | low                                   | high                                        | low            | low             | low                     | 4                                      | low                |
| Hjortebjerg et al [20] | 2016  | low                                   | low                                         | low            | high            | low                     | 4                                      | low                |
| Arroyo et al [21]      | 2016b | low                                   | low                                         | high           | high            | high                    | 2                                      | high               |

|                    |      |     |     |      |      |      |   |      |
|--------------------|------|-----|-----|------|------|------|---|------|
| Diaz et al<br>[23] | 2016 | low | low | high | high | high | 2 | high |
|--------------------|------|-----|-----|------|------|------|---|------|

**Table S12 Assessment of the risk of bias in the individual studies for Table S6**

|                       |      | Bias due to selection of participants | Information bias due to exposure assessment | Outcome bias I | Outcome bias II | Bias due to confounding | Count of columns with low risk of bias | Total risk of bias |
|-----------------------|------|---------------------------------------|---------------------------------------------|----------------|-----------------|-------------------------|----------------------------------------|--------------------|
| Gehring et al<br>[17] | 2014 | low                                   | high                                        | low            | low             | low                     | 4                                      | low                |
| Hystadt et al<br>[19] | 2014 | low                                   | high                                        | low            | low             | low                     | 4                                      | low                |
